# Supplementary material for: Canonical NF-κB signaling maintains corneal epithelial integrity and prevents corneal aging via retinoic acid
Source: eLife. 2021 Jun 4;10:e67315. doi: 10.7554/eLife.67315 (PMC8192125; doi:10.7554/eLife.67315)
Supplement: Figure 1—source data 1. [file elife-67315-fig1-data1.xlsx]

## Sheet: A
	Veh	NaOH 3D
p-RelA/ RelA	0.985984	2.82846
	0.89437	3.0314
	1.11965	2.6536
T.TEST		P<0.001
RelA/Actin	1.03648	2.32207
	0.827195	1.95674
	1.13633	3.17111
T.TEST		P=0.016
p-IKKα/β/IKKα	1.2661	5.63019
	0.913756	5.03852
	0.820148	4.20567
T.TEST		P<0.001

## Sheet: B
		Veh									NaOH 3D									NaOH 7D
	Corneal epithelia	1.1875	1.25714	1.22973	1.19718	1.25	1.20988	1.26829	1.16438	1.29412	2.70588	2.84375	2.71429	2.91176	2.6129	2.55556	2.6875	2.82353	2.85714	2.75472	2.70909	2.7551	2.92	2.77359	2.84314	2.53846	2.75926	2.8125
	Corneal stroma	0.133333	0.071429	0.1875	0.055556	0.1875	0.066667	0.25	0.117647	0.142857	1.38095	1.22727	1.26316	1.2	1.23809	1.13636	1.11765	1.1	1.15789	1	1.13333	1.11765	1.05263	1.22222	1.1875	1.16667	1.1	1.05882
	Limbal epithelia	0.48	0.521739	0.384615	0.428571	0.409091	0.375	0.307692	0.37931	0.36	2.375	2.31818	2.34615	2.30435	2.5	2.62963	2.47826	2.46154	2.54546	2.41667	2.28	2.34783	2.14286	2.26087	2.12	2.375	2.22727	2.56
	Limbal stroma	0.133333	0.071429	0.058824	0.125	0.066667	0.166667	0.117647	0.071429	0	1.15	1.14286	1.16667	1.26316	1.23529	1.04762	1.31579	1.15789	1.22222	1.1	1.15789	1.09091	1.05882	1.26316	1.14286	1.05556	1.3	1.28571
	Two-way ANOVA (Tukey's multiple comparisons test)
	Corneal epithelia:Veh vs. Corneal epithelia NaOH 3D					P<0.001
	Corneal epithelia:Veh vs. Limbal epithelia:Veh					P<0.001
	Limbal epithelia:Veh vs. Limbal epithelia NaOH 3D					P<0.001
	Corneal Stroma:Veh vs. Corneal Stroma NaOH 3D					P<0.001
	Limbal Stroma:Veh vs. Limbal Stroma NaOH 3D					P<0.001

## Sheet: C
RelA/Actin	0.975824	0.117988
	0.903555	0.0763174
	1.12062	0.129347
T.TEST		P<0.001

## Sheet: D
		Relaf/f						Relakrt14cre
	Veh	49	55	48	53	51	47	45	51	52	47	43	49
	RA	68	57	61	59	54	53	19	13	18	16	22	20
	Two-way ANOVA (Tukey's multiple comparisons test)
	Relaf/f:Veh vs. Relakrt14cre:Veh				P=0.191
	Relaf/f:NaOH vs. Relakrt14cre:NaOH				P<0.001
