# Supplementary material for: Canonical NF-κB signaling maintains corneal epithelial integrity and prevents corneal aging via retinoic acid
Source: eLife. 2021 Jun 4;10:e67315. doi: 10.7554/eLife.67315 (PMC8192125; doi:10.7554/eLife.67315)
Supplement: Figure 2—figure supplement 1—source data 1. [file elife-67315-fig2-figsupp1-data1.xlsx]

## Sheet: Sheet1
	Relaf/f	Relak14cre
	1	2
	1	1
	2	2
	1	1
	2	2
	1	1
T.TEST		P=0.599
