# Supplementary material for: Canonical NF-κB signaling maintains corneal epithelial integrity and prevents corneal aging via retinoic acid
Source: eLife. 2021 Jun 4;10:e67315. doi: 10.7554/eLife.67315 (PMC8192125; doi:10.7554/eLife.67315)
Supplement: Figure 2—source data 1. [file elife-67315-fig2-data1.xlsx]

## Sheet: D
		Relaf/f						Relakrt14cre
	Cornea	35	39	32	37	33	34	5	3	7	4	6	6
	Limbus	21	19	18	23	20	19	17	19	23	22	20	18
	T.TEST
	Relaf/f:Cornea vs. Relakrt14cre:Cornea				P<0.001
	Relaf/f:Limbus vs. Relakrt14cre:Limbus				P=0.892

## Sheet: E
	Relaf/f	Relak14cre
	0.863156	0.215789
	0.941278	0.337438
	1.19557	0.291727
T.TEST		P=0.003
