# Supplementary material for: Canonical NF-κB signaling maintains corneal epithelial integrity and prevents corneal aging via retinoic acid
Source: eLife. 2021 Jun 4;10:e67315. doi: 10.7554/eLife.67315 (PMC8192125; doi:10.7554/eLife.67315)
Supplement: Figure 3—figure supplement 3—source data 1. [file elife-67315-fig3-figsupp3-data1.xlsx]

## Sheet: C
Krt12	Relaf/f	Relak14cre
	1.16426	0.068841
	0.734285	0.101843
	1.10146	0.084168
T.TEST		P=0.002
Krt1	Relaf/f	Relak14cre
	1.25032	467.346
	0.549919	343.24
	1.19938	339.505
T.TEST		P<0.001
Krt10	Relaf/f	Relak14cre
	1.39903	470.949
	0.697095	408.566
	0.90402	469.32
T.TEST		P<0.001
