# Supplementary material for: Canonical NF-κB signaling maintains corneal epithelial integrity and prevents corneal aging via retinoic acid
Source: eLife. 2021 Jun 4;10:e67315. doi: 10.7554/eLife.67315 (PMC8192125; doi:10.7554/eLife.67315)
Supplement: Figure 3—figure supplement 4—source data 1. [file elife-67315-fig3-figsupp4-data1.xlsx]

## Sheet: A
	Relaf/f	Relak14cre
	30	24
	25	27
	28	36
	33	29
	37	25
	29	34
T.TEST		P=0.665
