# Supplementary material for: Canonical NF-κB signaling maintains corneal epithelial integrity and prevents corneal aging via retinoic acid
Source: eLife. 2021 Jun 4;10:e67315. doi: 10.7554/eLife.67315 (PMC8192125; doi:10.7554/eLife.67315)
Supplement: Figure 3—source data 1. [file elife-67315-fig3-data1.xlsx]

## Sheet: B
		Relaf/f						Relakrt14cre
	Cornea	55	51	47	50	46	52	105	95	90	98	103	100
	Limbus	21	25	24	26	22	23	24	22	26	21	20	27
T.TEST	Relaf/f:Cornea vs. Relakrt14cre:Cornea				P<0.001
	Relaf/f:Limbus vs. Relakrt14cre:Limbus				P=0.906

## Sheet: E
					WT-1	WT-2	WT-3	KO-1	KO-2	KO-3
			Krt78	mRNA	132.64	70.68	118.27	261.87	110.67	223.55
			Krt24	mRNA	0	0.18	0.06	407.2	232.36	23.42
			Krt76	mRNA	0.58	0.64	0.71	140.98	25.3	37.31
			Krt1	mRNA	7.17	6.71	6.63	7344.74	1989.94	3557.46
			Krt7	mRNA	85.12	58.07	77.77	72.06	145.53	163.02
			Krt19	mRNA	216.77	211.75	249.28	255.19	331.52	371.73
			Krt16	mRNA	14.13	1249.89	23.18	4944.91	4522.22	5221.38
			Krt10	mRNA	8.55	11.03	6.86	6198.85	5248.42	5749.91
			Krt4	mRNA	90.58	145.24	221.11	18975.5	17397.3	17030.3
			Krt17	mRNA	20.04	45.54	26.29	1785.35	1669.3	2067.82
			Krt23	mRNA	12.46	14.23	12.01	65.15	51.55	66.22
			Krt13	mRNA	2386.81	2361.65	3365.39	47533.4	44797.2	33390.2
			Krt6b	mRNA	6542.51	7592.97	7126.01	14809.1	18007	14176.1
			Krt14	mRNA	346.93	1632.99	443.33	10117.2	12307.8	10800
			Krt6a	mRNA	5103.7	7233.59	5687.43	13174.3	14797.3	12670.9
