# Supplementary material for: Canonical NF-κB signaling maintains corneal epithelial integrity and prevents corneal aging via retinoic acid
Source: eLife. 2021 Jun 4;10:e67315. doi: 10.7554/eLife.67315 (PMC8192125; doi:10.7554/eLife.67315)
Supplement: Figure 4—figure supplement 1—source data 1. [file elife-67315-fig4-figsupp1-data1.xlsx]

## Sheet: A
K12 cells/field		Relaf/f			Relak14cre
	KSFM	0	0	0	0	0	0
	DMEM/F12+FBS	16	19	20	1	2	2
	DMEM/F12+FBS+RA	20	18	21	15	17	16
	Two-way ANOVA (Tukey's multiple comparisons test)
	Relaf/f:DMEM/F12+FBS+Veh vs. Relakrt14cre:DMEM/F12+FBS+Veh							P<0.001
	Relakrt14cre:DMEM/F12+FBS+Veh vs. Relakrt14cre:DMEM/F12+FBS+RA							P<0.001
KI67 cells/field		Relaf/f			Relak14cre
	KSFM	25	22	21	24	23	22
	DMEM/F12+FBS	15	14	17	3	3	4
	DMEM/F12+FBS+RA	13	18	16	15	12	13
	Two-way ANOVA (Tukey's multiple comparisons test)
	Relaf/f:DMEM/F12+FBS+Veh vs. Relakrt14cre:DMEM/F12+FBS+Veh							P<0.001
	Relakrt14cre:DMEM/F12+FBS+Veh vs. Relakrt14cre:DMEM/F12+FBS+RA							P<0.001

## Sheet: B
Krt12		Relaf/f			Relak14cre
	KSFM	1.05	0.98	1.1	1.02	1.05	0.96
	DMEM/F12+FBS	22.05	19.26	17.98	2.04	2.82	1.33
	DMEM/F12+FBS+RA	20.55	21.32	18.77	15.66	17.21	16.33
	Two-way ANOVA (Tukey's multiple comparisons test)
	Relaf/f:DMEM/F12+FBS+Veh vs. Relakrt14cre:DMEM/F12+FBS+Veh							P<0.001
	Relakrt14cre:DMEM/F12+FBS+Veh vs. Relakrt14cre:DMEM/F12+FBS+RA							P<0.001
Aldh1a1		Relaf/f			Relak14cre
	KSFM	1.03	0.88	1.09	0.25	0.18	0.16
	DMEM/F12+FBS	1.58	1.36	1.45	0.22	0.31	0.19
	DMEM/F12+FBS+RA	1.32	1.28	1.36	0.18	0.2	0.15
	Two-way ANOVA (Tukey's multiple comparisons test)
	Relaf/f:KSFM vs. Relakrt14cre:KSFM							P<0.001
	Relaf/f:DMEM/F12+FBS+Veh vs. Relakrt14cre:DMEM/F12+FBS+Veh							P<0.001
	Relaf/f:DMEM/F12+FBS+RA vs. Relakrt14cre:DMEM/F12+FBS+RA							P<0.001

## Sheet: C
Krt1		Relaf/f			Relak14cre
	Cornea epithelia (6M)	0.92	1.2	0.88	350	395	421
	KSFM	0.85	0.88	1.21	0.96	1.14	0.75
	DMEM/F12+FBS	0.99	1.11	0.85	1.15	1.11	0.84
Krt10		Relaf/f			Relak14cre
	Cornea epithelia (6M)	0.95	0.89	1.16	420	450	395
	KSFM	0.75	0.98	1.11	0.86	1.16	0.85
	DMEM/F12+FBS	0.89	1.01	0.95	1.25	1.01	0.86

## Sheet: D
K12+ cells/field	KSFM+VEH	KSFM+BMS493	DMEM/F12+FBS+VEH	DMEM/F12+FBS+BMS493
	0	0	16	3
	0	0	14	2
	0	0	18	1
	T.TEST
	DMEM/F12+FBS+Veh vs. DMEM/F12+FBS+BMS493					P<0.001
Ki67+ cells/field	KSFM+VEH	KSFM+BMS493	DMEM/F12+FBS+VEH	DMEM/F12+FBS+BMS493
	25	23	15	6
	22	20	14	4
	21	22	17	5
	T.TEST
	DMEM/F12+FBS+Veh vs. DMEM/F12+FBS+BMS493					P<0.001

## Sheet: E
Krt12	KSFM+VEH	KSFM+BMS493	DMEM/F12+FBS+VEH	DMEM/F12+FBS+BMS493
	1.02	0.96	16.95	1.25
	1.08	1	19.25	1.96
	0.95	1.06	18.36	1.59
	T.TEST
	DMEM/F12+FBS+Veh vs. DMEM/F12+FBS+BMS493					P<0.001
