# Supplementary material for: Canonical NF-κB signaling maintains corneal epithelial integrity and prevents corneal aging via retinoic acid
Source: eLife. 2021 Jun 4;10:e67315. doi: 10.7554/eLife.67315 (PMC8192125; doi:10.7554/eLife.67315)
Supplement: Figure 4—source data 1. [file elife-67315-fig4-data1.xlsx]

## Sheet: C
		WT-1	WT-2	WT-3	KO-1	KO-2	KO-3
	Aldh1a1	6.01145	6.54921	6.49105	4.15543	4.13011	4.30961
	Rarg	7.82171	7.70023	7.75535	7.44419	7.75636	7.62746
	Aldh1a3	6.11707	6.01792	6.15846	5.81557	5.99707	6.1811
	Dhrs3	5.92647	5.92671	6.0568	5.64789	5.80374	5.83693
	Rxra	5.49442	5.6372	5.51759	5.65306	5.63952	5.61589
	Rxrb	3.90593	3.92505	3.88069	3.774	3.65076	3.69488
	Rdh10	2.72247	3.06695	2.926	3.16189	2.85997	2.95047
	Rara	2.63227	2.5656	2.60407	2.63459	2.87184	2.75275
	Rarb	0.782409	0.863938	0.722466	0.321928	0.632268	0.495695
	Aldh1a2	0	0	0	0.028569	0	0
	Rbp1	3.29866	3.91934	3.82375	5.32769	4.88655	4.97591

## Sheet: D
Aldh1a1	Relaf/f	Relak14cre
	0.743746	0.120983
	1.17111	0.239464
	1.08514	0.161307
T.TEST		P=0.004

## Sheet: E
Aldh1a1/Actin	Relaf/f	Relak14cre
	0.91488	0.185505
	1.11018	0.159306
	0.974936	0.233703
T.TEST		P<0.001

## Sheet: I
	IgG	RelA
	0.007652	0.223756
	0.010896	0.241484
	0.010097	0.193446
T.TEST		P<0.001
