# Supplementary material for: Canonical NF-κB signaling maintains corneal epithelial integrity and prevents corneal aging via retinoic acid
Source: eLife. 2021 Jun 4;10:e67315. doi: 10.7554/eLife.67315 (PMC8192125; doi:10.7554/eLife.67315)
Supplement: Figure 5—figure supplement 2—source data 1. [file elife-67315-fig5-figsupp2-data1.xlsx]

## Sheet: A
Vegfa	Relaf/f	Relak14cre
	1.11109	3.08865
	0.918262	2.76442
	0.97062	3.06732
	T.TEST	P<0.001
Vegfb	Relaf/f	Relak14cre
	1.11863	0.98742
	0.807613	1.05098
	1.06935	0.883765
	T.TEST	P=0.832
Vegfc	Relaf/f	Relak14cre
	0.930164	0.795843
	1.16115	1.21046
	0.89537	0.752914
	T.TEST	P=0.675
Vegfd	Relaf/f	Relak14cre
	1.22603	1.17202
	0.888223	0.860945
	0.903749	0.739178
	T.TEST	P=0.654

## Sheet: B
PCNA+ cells/field		Relaf/f						Relak14cre
	veh	42	49	55	58	51	61	99	91	115	102	97	108
	axitinib	51	52	63	47	56	42	0	1	2	0	0	0
	T.TEST
	Relaf/f:Veh vs. Relakrt14cre:Veh				P<0.001
	Relaf/f:RA vs. Relakrt14cre:RA				P<0.001
