# Supplementary material for: Canonical NF-κB signaling maintains corneal epithelial integrity and prevents corneal aging via retinoic acid
Source: eLife. 2021 Jun 4;10:e67315. doi: 10.7554/eLife.67315 (PMC8192125; doi:10.7554/eLife.67315)
Supplement: Figure 5—source data 1. [file elife-67315-fig5-data1.xlsx]

## Sheet: D
PCNA+ cells/field		Relaf/f						Relak14cre
	Veh	50	42	45	58	52	51	112	95	102	115	91	97
	RA	41	48	55	57	52	53	49	53	59	47	58	51
	Two-way ANOVA (Tukey's multiple comparisons test)
	Relaf/f:Veh vs. Relakrt14cre:Veh				P<0.001
	Relaf/f:RA vs. Relakrt14cre:RA				P=0.564
	Relakrt14cre:Veh vs. Relakrt14cre:RA				P<0.001
PCNA+ cells/field		Relaf/f						Relak14cre
	Veh	60	62	65	68	55	52	18	15	13	25	20	16
	RA	65	58	68	70	62	63	59	63	68	57	66	61
	Two-way ANOVA (Tukey's multiple comparisons test)
	Relaf/f:Veh vs. Relakrt14cre:Veh				P<0.001
	Relaf/f:RA vs. Relakrt14cre:RA				P=0.434
	Relakrt14cre:Veh vs. Relakrt14cre:RA				P<0.001
