# Supplementary material for: Canonical NF-κB signaling maintains corneal epithelial integrity and prevents corneal aging via retinoic acid
Source: eLife. 2021 Jun 4;10:e67315. doi: 10.7554/eLife.67315 (PMC8192125; doi:10.7554/eLife.67315)
Supplement: Figure 6—figure supplement 1—source data 1. [file elife-67315-fig6-figsupp1-data1.xlsx]

## Sheet: Sheet1
TUNEL+ cells/field
	3M	24M-moderate
	7	5
	6	7
	8	6
	4	4
	5	6
	5	4
	T.TEST		P=0.535
