# Supplementary material for: Canonical NF-κB signaling maintains corneal epithelial integrity and prevents corneal aging via retinoic acid
Source: eLife. 2021 Jun 4;10:e67315. doi: 10.7554/eLife.67315 (PMC8192125; doi:10.7554/eLife.67315)
Supplement: Figure 6—source data 1. [file elife-67315-fig6-data1.xlsx]

## Sheet: C
	PCNA+ cells/field
		3M						24M-moderate						24M-severe
	Central	56	50	59	55	62	53	10	9	7	8	6	11	91	89	99	85	95	92
	Limbus	31	28	25	27	24	33	33	25	24	28	27	25	27	24	28	30	25	27
	T.TEST
	Cornea:3M vs. Cornea:24M-moderate				P<0.001
	Cornea:3M vs. Cornea:24M-severe				P<0.001
	Limbus:3M vs. Limbus:24M-moderate				P=0.619
	Limbus:3M vs. Limbus:24M-moderate				P=0.499

## Sheet: D
K12+ cells/field
	3M	24M-moderate	24M-severe
	88	18	0
	85	25	0
	86	13	0
	91	15	0
	83	10	0
	89	22	0
	T.TEST
	3M vs. 24M-moderate			P<0.001
	3M vs. 24M-severe			P<0.001
Pax6+ cells/field
	3M	24M-moderate	24M-severe
	85	43	0
	77	35	0
	79	34	0
	88	41	0
	92	30	0
	81	45	0
	T.TEST
	3M vs. 24M-moderate			P<0.001
	3M vs. 24M-severe			P<0.001
