# Supplementary material for: Canonical NF-κB signaling maintains corneal epithelial integrity and prevents corneal aging via retinoic acid
Source: eLife. 2021 Jun 4;10:e67315. doi: 10.7554/eLife.67315 (PMC8192125; doi:10.7554/eLife.67315)
Supplement: Figure 7—source data 1. [file elife-67315-fig7-data1.xlsx]

## Sheet: A
p-RelA/RelA	3M	24M-moderate
	0.77519	0.601691
	1.0716	0.579999
	1.15321	0.632352
	T.TEST		P=0.027
RelA/Actin	3M	24M-moderate
	1.1242	0.257952
	1.03114	0.302437
	0.84466	0.32474
	T.TEST		P=0.001
Aldh1a1/Actin	3M	24M-moderate
	0.938262	0.203495
	0.854508	0.166788
	1.20723	0.263569
	T.TEST		P=0.002

## Sheet: B
Rela	3M	24M
	0.843746	0.320983
	1.07111	0.439464
	1.08514	0.461307
	T.TEST		P=0.003
	Relaf/f	Relak14cre
	0.793765	0.19751
	1.05745	0.249464
	1.15487	0.165607
	T.TEST		P=0.002

## Sheet: F
		6M						24M
	veh	81	88	83	84	85	86	0	0	0	0	0	0
	ra	89	83	85	80	88	92	78	84	79	86	81	83
	Two-way ANOVA (Tukey's multiple comparisons test)
	6M:VEH vs. 24M:VEH			P<0.001
	6M:RA vs. 24M:RA			P=0.174
	24M:VEH vs. 24M:RA			P<0.001
